# Supplementary material for: Development of a Red recombinase system and antisense RNA technology in Klebsiella pneumoniae for the production of chemicals
Source: Royal Society of Chemistry journal article supplement (doi:10.1039/c6ra12511e), 2016-01-01
Supplement: c6ra12511e1.pdf [file c6ra12511e1.pdf]

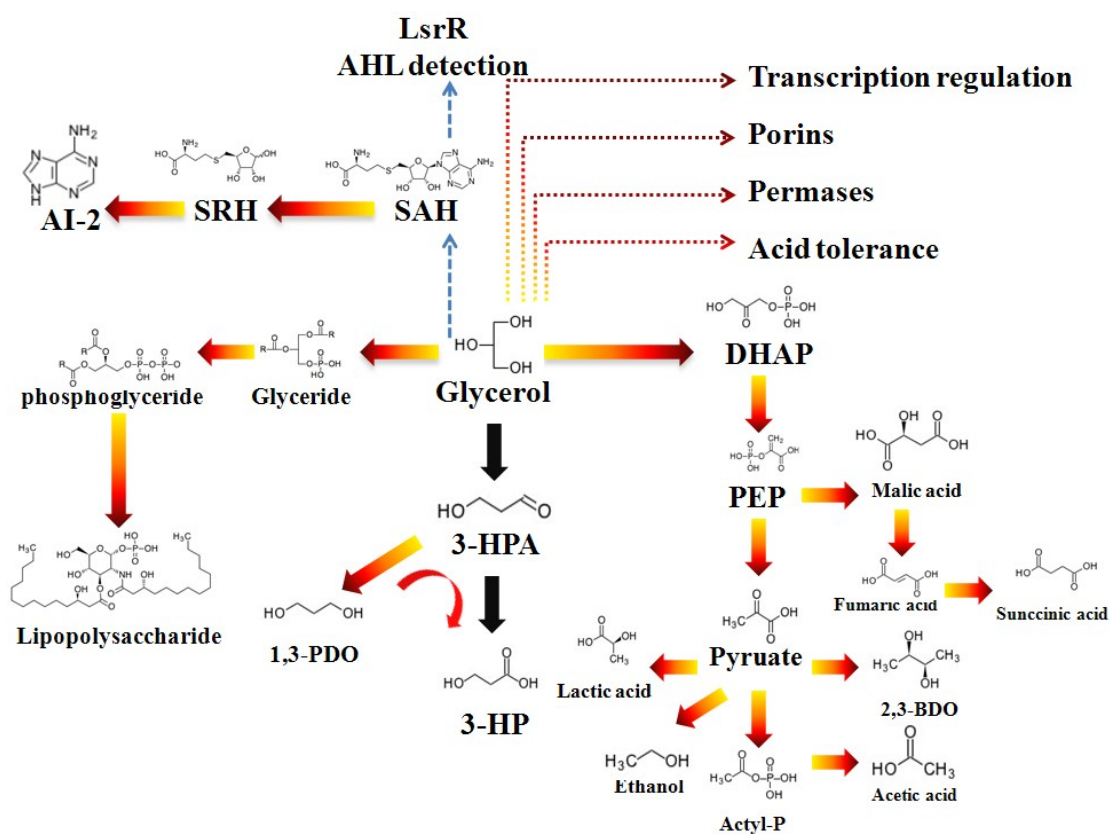

**Supplementary Fig. 1** Oligo-mediated homologous recombination to modify the enzymes associated with glycerol metabolism. 3-HPA: 3-hydroxypropionaldehyde; 3-HP: 3-hydroxypropionic acid; 1,3-PDO: 1,3-propanediol; DHAP: dihydroxy acetone phosphate; 2,3-BDO: 2,3-butanediol; PEP: phosphoenolpyruvic acid; AHL: acyl-homoserine lactone; SAH: S-Adenosyl-L-homocysteine; AI-2: autoinducer 2; SRH: S-ribosyl-L-homocysteine.



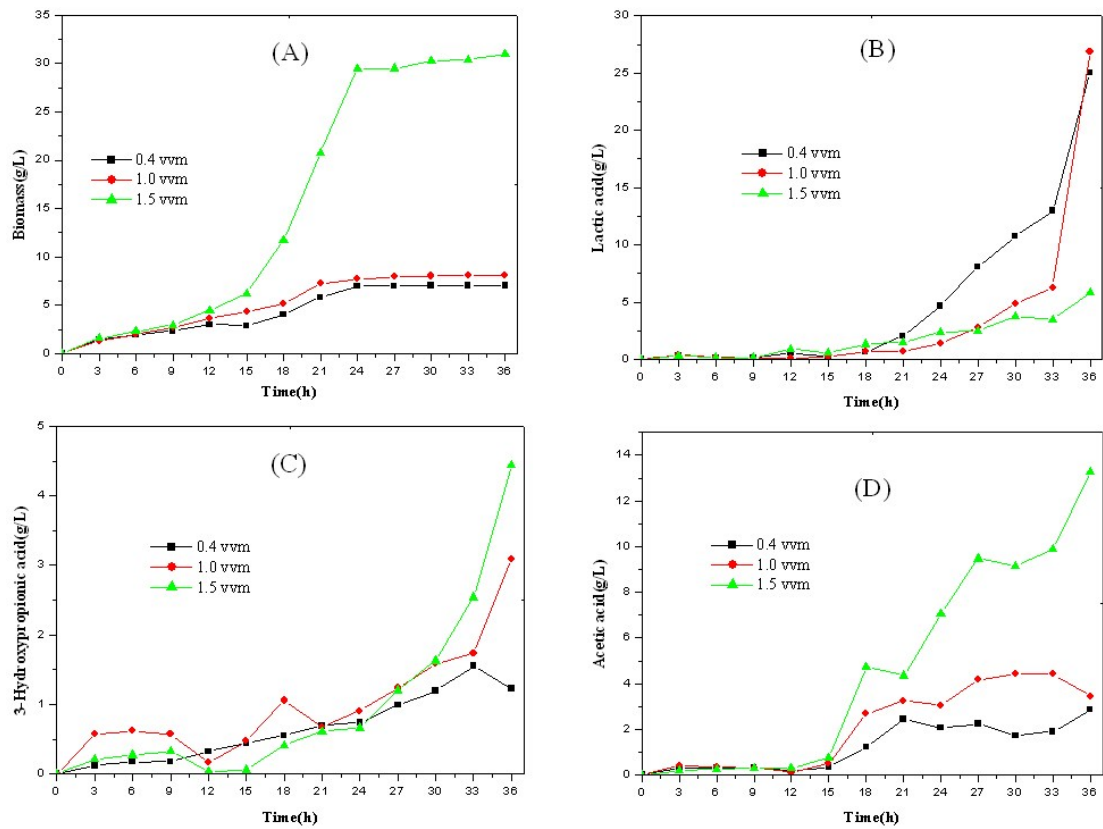

**Supplementary Fig. 3** Bioreactor cultivation of the recombinant strain Kp3 under different conditions. Agitations were set at 200 rpm, 300 rpm and 400 rpm with air supply at 0.4, 1.0 or 1.5 vvm.

**Supplementary Table 1.** Primers used in this study.

| Primer                            | Sequence (5'-3')                                                                                               |
|-----------------------------------|----------------------------------------------------------------------------------------------------------------|
| <i>Bam</i> H-Red-F                | CGCGGATCCACGCTTTTATCGCAACTCTCT (for PCR amplification of Red recombinases)                                     |
| <i>Hind</i> -Red-R                | CCCAAGCTTTCATCGCCATTGCTCCCCAAATAC                                                                              |
| <i>Bam</i> H-aldH-F               | CGCGGATCCATGAATTTTCATCATCTGGC (for PCR amplification of <i>aldH</i> gene)                                      |
| <i>Sac</i> -aldH-R                | TCCGAGCTCTCAGGCCTCCAGGCTTATCCA                                                                                 |
| <i>Sac</i> -cm-F                  | TCCGAGCTCCAATAAACCGGTAAACCAGCA (for amplification of chloromycetin resistance gene)                            |
| <i>Hind</i> -cm-R                 | CCCAAGCTTAGCTGATAGAAACAGAAGCC                                                                                  |
| AT-F                              | ATAACCTGAAGCGAGAAGGTATATTATGAATTTTCATCATC                                                                      |
| AT-R                              | GACATGACGGCCCCCTCGTTAACAGAGCTGATAGAAACAGAAG                                                                    |
| <i>Bam</i> H-llddU-F              | CGCGGATCCAGCAGATTGGCGTCTCCGATATTC (for PCR amplification of the upstream homologous arm of <i>lldd</i> gene)   |
| <i>Eco</i> R-llddU-R              | CCGGAATTCACGAGTTCTCCCTGGAATTTTCAT                                                                              |
| <i>Eco</i> R-llddD-F              | CCGGAATCTTCTCCACGTTTTCCCTTACGCCGC (for PCR amplification of the downstream homologous arm of <i>lldd</i> gene) |
| <i>Hind</i> -llddD-R              | CCCAAGCTTTTGGTGAAACGGCGGTGATTGAGGA                                                                             |
| <i>Bam</i> H-anti- <i>ldh</i> -F  | CGCGGATCCCTGAAAGATCGCGGCT (for PCR amplification of antisense module of <i>ldh</i> gene)                       |
| <i>Bam</i> H-anti- <i>ldh</i> -R  | CGCGGATCCAGTTGTTGCTGATGAACCCCATAT                                                                              |
| <i>Eco</i> R-anti- <i>poxB</i> -F | CCGGAATTCACATCCCATCCAGCGAAAT (for PCR amplification of antisense module of <i>poxB</i> gene)                   |
| <i>Hind</i> -anti- <i>poxB</i> -R | CCGGAATTC AATAAGCTGCGCCAGCT                                                                                    |
| <i>Eco</i> R-and- <i>poxB</i> -R  | CCGGAATTC AATAAGCTGCGCCAGCT                                                                                    |
| <i>Sac</i> -pk-F                  | TCCGAGCTCCGTTATTTGTCGCCGCCAT                                                                                   |
| <i>Hind</i> -aldH-R               | CCCAAGCTTTCAGGCCTCCAGGCTTATCCAGAT                                                                              |

---

|                  |                                                              |
|------------------|--------------------------------------------------------------|
| pET-F            | AGATCTCGATCCCGCGAAATTAATACGAC (for colony PCR)               |
| T7-ter           | CAAAAACCCCTCAAGACCCGTTTAGAGGC                                |
| Below are oligos |                                                              |
| M-02059          | TTCGGCCTCGGCACCTTTAATGAGCTGTAATAGAGCTGATCGCCTTCAGCAGTCAGGTC  |
| M-01632          | ACCATCTCCACCCGCGAGGCCAGCGACTAATAGATGTCGATATCGCGGTGATCACCGTC  |
| M-02143          | GATGCCCCATGGGCGATGCCCGTGGCGTAATAGGCGCCACCGGGATGTACGCCCGCCGC  |
| M-04368          | CTGACGGCGCTACAGCTGGCGCGAAATAATAATTTTGTGCGCCGCGAGCAGGCCATGG   |
| M-00764          | TTGAAGTATGCAAAGACGGAGAGAAGCTAATAGCGTTTTAATTTTTATGATTAGCGGCG  |
| M-03613          | ATGCAGCTCAACATTACAGGACACAATAATTACGCCTGCGATGCGCGAATTCGTT      |
| M-01740          | GCTGCCACACTGCTTACTCTTACACCATAATAGATACCGCGCTCATCTGCGCACGGCG   |
| M-04320          | GGCGCGGCGGCGTTCGATTGCCGTTTGTAAATAGGGCTGGCCATTCATATCGTGCTGGTT |
| M-04011          | CAGGGCACTACCAGCTCCCGGGCCGTTTAATAGATCATGATGCCAATATCGTCAGCGTC  |
| M-00904          | ATTAACGGTTTGTGTTGACTGTCATCGCTAATAGTCCCGGTGCTGGCCATCGCCGCCAC  |
| M-01695          | GCACTGGGGCCTGGCGCCGCGCTGGATTAATAGATCAACAACAACGAAGTGAAGCCTG   |
| M-02688          | AGAGATCATTGCCAACTACCACGGAATAATAGGACGCGGAAGTGGTGCTGGTGAAGG    |
| M-03018          | CTTTATGCGCGATCATCTGAACGGAATAATAGGAAATTATCGACATTCGCCAATGGG    |
| M-02792          | AGCCCCTTCGCGCTGCGGCAGTTCGCCTAATAGGCGAACGTCTGCCGCTGACCGGGGTG  |
| M-0030           | GGCGGCCTGCTCTCCAATATCCCGGAGTAATAGGCTGGCGCTCACCGCCCTGGAGAGCC  |
| M-03828          | TTCAACGAGCAGGTGCGCTATGCCTGGTAATAGCGCGCTGCAGGATCTAAAAAGCACGC  |
| M-01662          | TTCGATGAGCTGCAGGGGATGAAGCGCTAATAGCGTTAGCGTTGGCATGGTGCAGGGCG  |
| M-03762          | CCGCCAGGCTCCGGGCAAATCACCACCTAATAGCAGCGATGTATCGGTAAACGATGCCA  |
| M-02580          | TCATTGACCTTTACCCAGGATCTGGAGTAATAGGACCGGCATACCGGACGCGGGCTTG   |
| M-03260          | ATGATGAAAGAGGGGCGGGGCGCAGCTAATAGCGGCGTAACCTTCTGTTTAGCAAAA    |
| M-00395          | CGCTACACGCGCCGTTTCTTGGGCGTTAATAGCGGCTGGCTGTTGACCACCCAGGTAT   |
| M-02893          | ATTGCAACCCTGGTGACGGGCGTTTTATAATAGCCTGGACAAGTTCATTTTTGCACCGA  |
| M-03830          | CGTAGCCTGCTGAAAACGAAGCAAAAATTAATAGTTCGGATTATCAGCCTGTTCCGCG   |
| M-04434          | GCGCATGCTGAAAAGCTTTGCGCACAGTAATAGCGTACGCCTGACTCCACAGCGTCTGG  |
| M-04462          | CGGCCGATCTTTGATATCGCCATGGATTAATAGCTACGTCTCGCAGCAAACCTTCTCCC  |
| M-04463          | TATGAGAGTAAAGGATTGATCCACAGTTAATAGGAATGCCGGCAATCAGCGGCGCTACC  |

---

---

|         |                                                              |
|---------|--------------------------------------------------------------|
| M-02788 | CCGCTGTGGCTGGGCATCGATTTGGGCTAATAGCGACGTGGTGTGCGATGGTGGTTGACC |
| M-04285 | GTGAACGTTGAGAACGAGCTGGATATTTAATAGGCTGTTTCGCGCTTTATGGGCAGGAA  |
| M-04527 | AAGGTGGCAGCCTGCGCTACGCTGCTGTAATAGAGCCACCTCTGTATTACTGGGAAG    |
| M-03602 | ATGAATGAAGCGGCGCAGAAAACCTTCTAATAGCCTGAAGAATGAACAGCCGAAGATTA  |
| M-00254 | TTTGCCGGGCTGCTGGTGGTGATGATTTAATAGTATGCTGGCCGAAATGGCGGTCGCCA  |
| M-00986 | AAACTGGGTTGGTCCCAGTATCACGACTAATAGTTTCTACGGTAACGGTTTCCAGAACA  |
| M-00051 | GGCAACTACCCGGACAACGCCGTCTTTAATAGCAACGTCGATATTAACCAGGGGAATA   |

---

The underlined sequences indicate restriction sites. F, forward; R, reverse.
